# Supplementary material
Source: publisher figshare collection journal article supplement (https://diabetesjournals.figshare.com/ndownloader/files/23532296)
Supplement: Supplementary file 1 [file 23532296]

## Online-Only Supplemental Material

### Supplemental Material

**Incidence of MI.** Trials varied in two key aspects regarding adjudicated MI events: 1) in- vs. exclusion of silent MIs; and 2) reporting of nonfatal and/or ‘fatal + nonfatal’ events. Given only 6 trials reported on silent MIs (LEADER, SUSTAIN-6, PIONEER-6, REWIND, OMNEON, and EMPA-REG), incidence rates exclusive of these events were sought for these trials to maximise unity with all others (n.b. this extended to seeking incidence rates of MACE excluding silent MIs). For OMNEON and REWIND, these data were provided directly by the investigators; otherwise, relevant data were available from either trial publications, the clinical study report, or regulatory agency documents (except for SUSTAIN-6 and PIONEER-6, for which MACE excluding silent MI could not be derived).

Incidence of nonfatal MI was preferred for calculation of the HHF/MI ratio; however, rates excluding fatal events were unavailable for ELIXA, LEADER, HARMONY, OMNEON and DECLARE. After comparing ratios of HHF/(nonfatal MI) and HHF/(fatal + nonfatal MI) in nine other trials that reported the breakdown of nonfatal and fatal MIs (Online Figure S1 below), it was determined that inclusion of fatal events had minimal impact on the incidence rate ratio. Thus, HHF/MI data for ELIXA, LEADER, HARMONY, OMNEON and DECLARE – where HHF/MI reflected fatal+nonfatal MI – were retained in analyses.

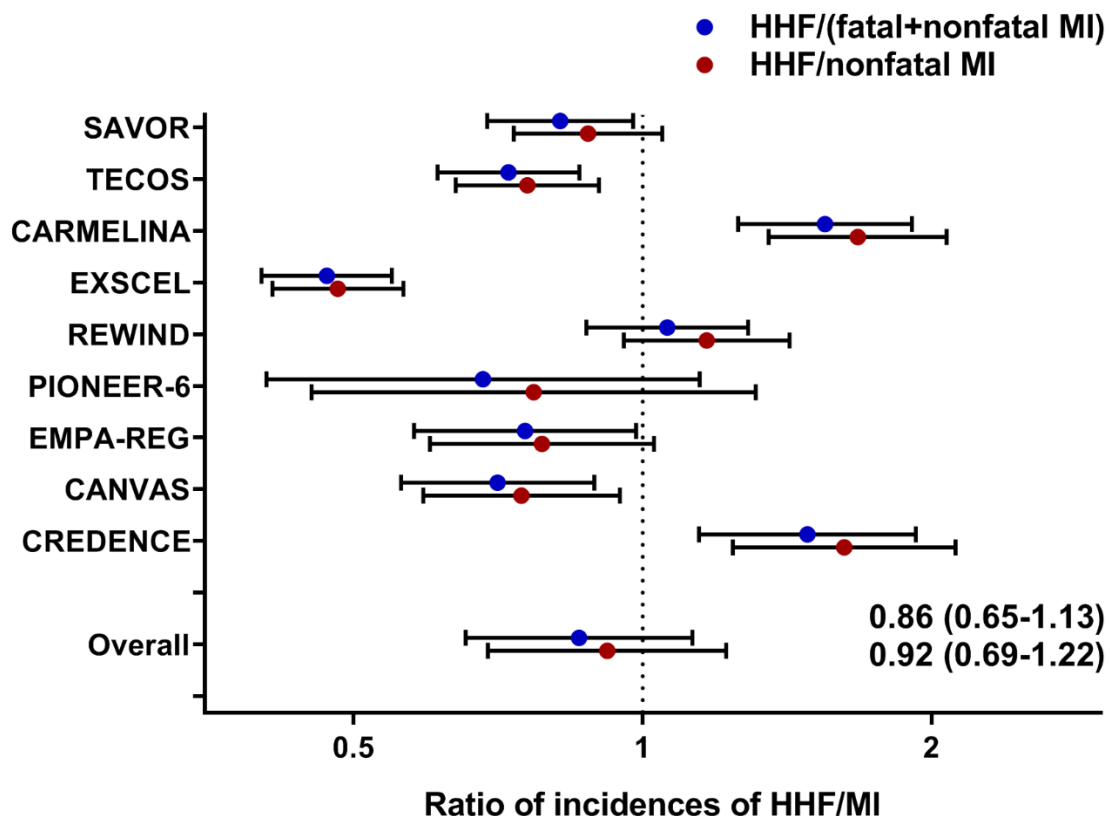

**Supplemental Figure S1.** Comparison of incidence rate ratios of HHF/MI, according to inclusion vs. exclusion of fatal MI events.

HHF, hospitalization for heart failure; MI, myocardial infarction.

**Incidence of Stroke.** Similarly to MI, the ELIXA, HARMONY, TECOS, OMNEON and DECLARE trials only reported on the incidence of stroke inclusive of both fatal and nonfatal events. HHF/stroke data for these trials – where HHF/stroke reflected fatal+nonfatal stroke – were again retained in our analyses nonetheless. This was based on there being no significant underestimation of the incidence rate ratio across 10 other trials that reported on both nonfatal and fatal stroke incidence separately (Online Figure S2 below).

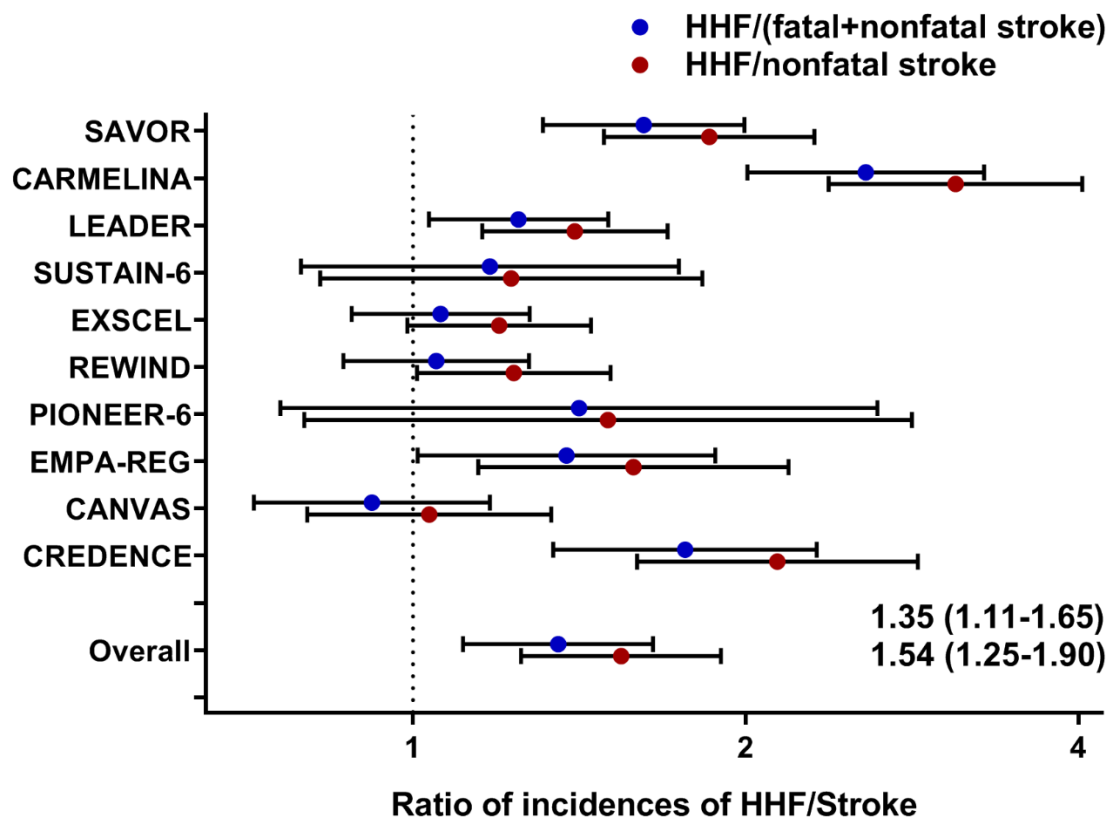

**Supplemental Figure S2.** Comparison of incidence rate ratios of HHF/Stroke, according to inclusion vs. exclusion of fatal stroke events.  
HHF, hospitalization for heart failure.

*Incidence of stroke in SAVOR and DECLARE.* In both the SAVOR (1) and DECLARE trials (2), rates of stroke were based on ischemic events only and – unlike other trials – excluded hemorrhagic and unknown/undefined stroke types. Since the incidence of stroke inclusive of all stroke types in DECLARE was reported in a subsequent meta-analysis (3), this rate was used in the current study for concordance with all other trials. Although corresponding data for SAVOR were unavailable, reported rates on the incidence of ischemic stroke were still used given DECLARE showed a large majority of its stroke events to be of ischemic origin (90%).

### **Additional notes regarding specific trials**

**REWIND.** Incidence rates of all CV events in the REWIND trial were not derived from the primary publication (4), but were provided by the REWIND investigators specifically for the current analyses. This was to ensure that: 1) the incidence of HHF was consistent with other trials (REWIND having employed a broader definition that included urgent outpatient visits for heart failure); and 2) the denominator for all CVD vs. MRF comparisons noted in Table 1 (i.e. n=4682) did not include anyone for whom a history of CVD was unknown or missing (as indicated in Figure 3 in the primary publication).

**EMPA-REG.** The definition of the composite endpoint ‘CV death or HHF’ in EMPA-REG excluded fatal stroke – unlike other trials. Nevertheless, we retained the reported rate in our analyses given that the rate of fatal stroke in the placebo group was only 0.5% and the number of ‘CV death or HHF’ events (n=198) would have increased by only a small number – i.e. between zero and 11 events (where zero would apply if all participants who died of stroke also experienced a preceding in-trial HHF event; 11 if none had such an event) (5).

**Supplemental Table S1.** Eligibility criteria for CVD and MRF subgroups

| <b>Trial</b>              | <b>CVD group</b>                                                                                                                                                                                                                                                                                                                                                                                                                                                     | <b>MRF group</b>                                                                                                                                                                                                                                                                                                                                                                                                                                                                                                                                |
|---------------------------|----------------------------------------------------------------------------------------------------------------------------------------------------------------------------------------------------------------------------------------------------------------------------------------------------------------------------------------------------------------------------------------------------------------------------------------------------------------------|-------------------------------------------------------------------------------------------------------------------------------------------------------------------------------------------------------------------------------------------------------------------------------------------------------------------------------------------------------------------------------------------------------------------------------------------------------------------------------------------------------------------------------------------------|
| <b>LEADER</b><br>(6,7)    | History of any of the following: <ul style="list-style-type: none"> <li>- MI</li> <li>- Stroke or TIA</li> <li>- <math>\geq 50\%</math> coronary artery stenosis</li> <li>- PCI or CABG</li> <li>- Angina with a positive stress imaging test and/or asymptomatic ischemia</li> <li>- <math>\geq 50\%</math> intracranial or carotid artery stenosis</li> <li>- <math>\geq 50\%</math> peripheral artery stenosis by imaging or ABI <math>&lt; 0.9</math></li> </ul> | $\geq 1$ of the following: <ul style="list-style-type: none"> <li>- CKD (microalbuminuria, proteinuria, or <math>\text{eGFR} &lt; 60 \text{ ml} \cdot \text{min}^{-1} \cdot 1.73 \text{ m}^{-2}</math>)</li> <li>- Hypertension with LV hypertrophy</li> <li>- NYHA class II or III heart failure</li> <li>- LV systolic or diastolic dysfunction</li> </ul>                                                                                                                                                                                    |
| <b>SUSTAIN-6</b><br>(8,9) | History of any of the following: <ul style="list-style-type: none"> <li>- MI</li> <li>- Stroke or TIA</li> <li>- Peripheral artery disease</li> <li>- <math>\geq 50\%</math> arterial stenosis (any)</li> <li>- PCI, CABG or peripheral revascularization</li> <li>- NYHA class II or III heart failure</li> </ul>                                                                                                                                                   | $\geq 1$ of the following: <ul style="list-style-type: none"> <li>- Hypertension with LV hypertrophy</li> <li>- LV systolic or diastolic dysfunction</li> <li>- CKD (microalbuminuria, proteinuria, or <math>\text{eGFR} &lt; 60 \text{ ml} \cdot \text{min}^{-1} \cdot 1.73 \text{ m}^{-2}</math>)</li> </ul>                                                                                                                                                                                                                                  |
| <b>EXSCEL</b><br>(10,11)  | History of any of the following: <ul style="list-style-type: none"> <li>- MI</li> <li>- Ischemic stroke</li> <li>- <math>\geq 50\%</math> coronary artery stenosis</li> <li>- PCI, CABG or peripheral revascularization</li> <li>- <math>\geq 50\%</math> carotid artery stenosis</li> <li>- Amputation due to vascular disease or intermittent claudication with ABI or toe-brachial index <math>&lt; 0.9</math></li> </ul>                                         | None                                                                                                                                                                                                                                                                                                                                                                                                                                                                                                                                            |
| <b>REWIND</b><br>(4)      | History of any of the following: <ul style="list-style-type: none"> <li>- MI</li> <li>- Unstable angina</li> <li>- Ischemic stroke</li> <li>- Need for PCI or hospitalization for unstable angina with ECG changes</li> <li>- Myocardial ischemia by stress test or with cardiac imaging</li> </ul>                                                                                                                                                                  | $\geq 1$ indicator of subclinical vascular disease: <ul style="list-style-type: none"> <li>- <math>&gt; 50\%</math> arterial stenosis (coronary, carotid, or lower extremity)</li> <li>- LV hypertrophy</li> <li>- CKD (albuminuria or <math>\text{eGFR} &lt; 60 \text{ ml} \cdot \text{min}^{-1} \cdot 1.73 \text{ m}^{-2}</math>)</li> </ul> <p><b>OR</b></p> $\geq 2$ of the following: <ul style="list-style-type: none"> <li>- Current tobacco use</li> <li>- Dyslipidemia</li> <li>- Hypertension</li> <li>- Abdominal obesity</li> </ul> |

| <b>Trial</b>                                                                                         | <b>CVD group</b>                                                                                                                                                                                                                                                                                                                                                                                       | <b>MRF group</b>                                                                                                                                                                                                                                                                     |
|------------------------------------------------------------------------------------------------------|--------------------------------------------------------------------------------------------------------------------------------------------------------------------------------------------------------------------------------------------------------------------------------------------------------------------------------------------------------------------------------------------------------|--------------------------------------------------------------------------------------------------------------------------------------------------------------------------------------------------------------------------------------------------------------------------------------|
| <b>CANVAS</b><br>(12,13)                                                                             | History of any of the following: <ul style="list-style-type: none"> <li>- MI</li> <li>- Stroke</li> <li>- Hospitalized unstable angina</li> <li>- PCI, CABG or peripheral revascularization</li> <li>- Amputation due to vascular disease or symptomatic carotid or peripheral vascular disease</li> </ul>                                                                                             | ≥2 of the following: <ul style="list-style-type: none"> <li>- Diabetes duration 10+ years</li> <li>- Systolic BP &gt;140 mmHg on ≥1 antihypertensive medication</li> <li>- Current smoking</li> <li>- Micro- or macro-albuminuria</li> <li>- HDL cholesterol &lt;1 mmol/L</li> </ul> |
| <b>DECLARE</b><br>(2)                                                                                | History of any of the following: <ul style="list-style-type: none"> <li>- Ischemic heart disease (MI, PCI, CABG, or ≥50% coronary artery stenosis)</li> <li>- Cerebrovascular disease (ischemic stroke or carotid revascularization)</li> <li>- Peripheral artery disease (peripheral revascularization, amputation due to vascular disease, or intermittent claudication with ABI &lt;0.9)</li> </ul> | ≥1 of the following: <ul style="list-style-type: none"> <li>- LDL cholesterol &gt;3.36 mmol/l</li> <li>- Hypertension (&gt;140 mmHg and &gt;90 mmHg, or on antihypertensive medication)</li> <li>- Current smoking</li> </ul>                                                        |
| <b>CREDENCE</b><br>(14,15)<br><br>(concurrent CKD was a requirement for both the CVD and MRF groups) | History of coronary, cerebrovascular, or peripheral vascular disease.                                                                                                                                                                                                                                                                                                                                  | None                                                                                                                                                                                                                                                                                 |

ABI, ankle-brachial index; BP, blood pressure; CABG, coronary artery bypass graft; CKD, chronic kidney disease; CVD, cardiovascular disease; ECG, electrocardiogram; eGFR, estimated glomerular filtration rate; HDL, high-density lipoprotein; LDL, low-density lipoprotein; LV, left-ventricular; MI, myocardial infarction; MRF, multiple risk factors; NYHA, New York Heart Association; PCI, percutaneous coronary intervention; TIA, transient ischemic attack.

## Supplemental Results

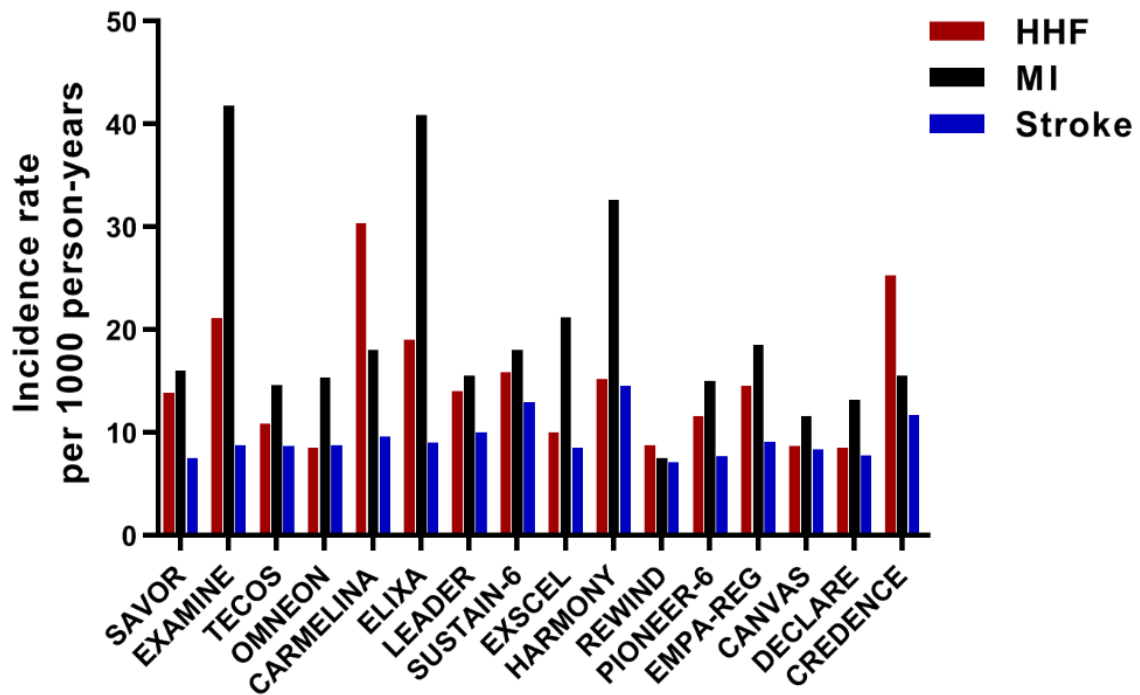

### Supplemental Figure S3. Incidence of CV events in the 16 analyzed trials

Rates of HHF, MI and stroke in the placebo arms of the 16 cardiovascular outcomes trials. For MI and stroke, incidence rates exclusive of silent MIs and fatal events were prioritized. HHF, hospitalization for heart failure; MI, myocardial infarction.

**Supplemental Table S2.** Baseline characteristics of the CVD and MRF subgroups

| <b>Trial</b>     | <b>N</b> | <b>Age<br/>(years)</b> | <b>Male<br/>(%)</b> | <b>BMI<br/>(kg/m<sup>2</sup>)</b> | <b>Diabetes<br/>duration<br/>(years)</b> | <b>HbA1c<br/>(%)</b> | <b>Insulin<br/>therapy<br/>(%)</b> | <b>Prior<br/>HF<br/>(%)</b> | <b>eGFR &lt;60<br/>ml min<sup>-1</sup><br/>1.73m<sup>-2</sup> (%)</b> |
|------------------|----------|------------------------|---------------------|-----------------------------------|------------------------------------------|----------------------|------------------------------------|-----------------------------|-----------------------------------------------------------------------|
| <b>LEADER</b>    |          |                        |                     |                                   |                                          |                      |                                    |                             |                                                                       |
| CVD              | 3372     | 64.0                   | 67.8                | 32.1                              | 12.9                                     | 8.7                  | 45.9                               | 18.7                        | 20.3                                                                  |
| MRF              | 1300     | 65.5                   | 54.4                | 33.3                              | 13.2                                     | 8.7                  | 44.8                               | 15.5                        | 27.6                                                                  |
| <b>SUSTAIN-6</b> |          |                        |                     |                                   |                                          |                      |                                    |                             |                                                                       |
| CVD              | 1271     | 64.2                   | 63.6                | 33.0                              | 13.3                                     | 8.7                  | NR                                 | 31.2                        | NR                                                                    |
| MRF              | 378      | 66.0                   | 47.9                | 32.3                              | 14.6                                     | 8.7                  | NR                                 | 0                           | NR                                                                    |
| <b>EXSCEL</b>    |          |                        |                     |                                   |                                          |                      |                                    |                             |                                                                       |
| CVD              | 5388     | 63.9                   | 66.8                | 31.4                              | 12                                       | 8.0                  | 51.6                               | 19.1                        | 21.1                                                                  |
| MRF              | 2008     | 59.4                   | 49.0                | 33.0                              | 10                                       | 8.0                  | 31.7                               | 8.1                         | 11.9                                                                  |
| <b>REWIND</b>    |          |                        |                     |                                   |                                          |                      |                                    |                             |                                                                       |
| CVD              | 1554     | 65.7                   | 69.9                | 31.9                              | 10.7                                     | 7.3                  | 23.6                               | 16.5                        | 24                                                                    |
| MRF              | 3128     | 66.3                   | 47.2                | 32.5                              | 10.5                                     | 7.4                  | 24.5                               | 5.1                         | 22                                                                    |
| <b>CANVAS</b>    |          |                        |                     |                                   |                                          |                      |                                    |                             |                                                                       |
| CVD              | 2900     | 63.8                   | 67.8                | 31.7                              | 13.4                                     | 8.2                  | 51.3                               | 17.8                        | 22.8                                                                  |
| MRF              | 1447     | 62.8                   | 54.3                | 32.5                              | 14.2                                     | 8.3                  | 49.6                               | 9.8                         | 18.5                                                                  |
| <b>DECLARE</b>   |          |                        |                     |                                   |                                          |                      |                                    |                             |                                                                       |
| CVD              | 3500     | 62.5                   | 72.1                | 32.1                              | 10.1                                     | 8.4                  | 44.2                               | 16.3                        | 10.9                                                                  |
| MRF              | 5078     | 64.7                   | 56.1                | 32.0                              | 9.9                                      | 8.3                  | 36.4                               | 5.5                         | 7.9                                                                   |
| <b>CREDENCE</b>  |          |                        |                     |                                   |                                          |                      |                                    |                             |                                                                       |
| CVD              | 1107     | 64.6                   | 69.5                | 31.6                              | 16.5                                     | 8.3                  | 67.8                               | 23.9                        | 61.5                                                                  |
| MRF              | 1092     | 61.7                   | 63.9                | 31.0                              | 15.5                                     | 8.3                  | 62.4                               | 5.3                         | 58.9                                                                  |

Data are mean/median or %, except where indicated.

BMI, body mass index; CVD, cardiovascular disease; eGFR, estimated glomerular filtration rate; HbA1c, glycated hemoglobin; HF, heart failure; MRF, multiple risk factors; NR, not reported.

## Supplemental Material References

1. Scirica BM, Bhatt DL, Braunwald E et al. Saxagliptin and cardiovascular outcomes in patients with type 2 diabetes mellitus. *N Engl J Med* 2013;369:1317-26.
2. Wiviott SD, Raz I, Bonaca MP et al. Dapagliflozin and Cardiovascular Outcomes in Type 2 Diabetes. *N Engl J Med* 2019;380:347-357.
3. Zelniker TA, Wiviott SD, Raz I et al. Comparison of the Effects of Glucagon-Like Peptide Receptor Agonists and Sodium-Glucose Cotransporter 2 Inhibitors for Prevention of Major Adverse Cardiovascular and Renal Outcomes in Type 2 Diabetes Mellitus. *Circulation* 2019;139:2022-2031.
4. Gerstein HC, Colhoun HM, Dagenais GR et al. Dulaglutide and cardiovascular outcomes in type 2 diabetes (REWIND): a double-blind, randomised placebo-controlled trial. *Lancet* 2019;394:121-130.
5. Zinman B, Inzucchi SE, Lachin JM et al. Empagliflozin and Cerebrovascular Events in Patients With Type 2 Diabetes Mellitus at High Cardiovascular Risk. *Stroke* 2017;48:1218-1225.
6. Marso SP, Daniels GH, Brown-Frandsen K et al. Liraglutide and Cardiovascular Outcomes in Type 2 Diabetes. *N Engl J Med* 2016;375:311-22.
7. Verma S, Poulter NR, Bhatt DL et al. Effects of Liraglutide on Cardiovascular Outcomes in Patients With Type 2 Diabetes Mellitus With or Without History of Myocardial Infarction or Stroke. *Circulation* 2018;138:2884-2894.
8. Marso SP, Bain SC, Consoli A et al. Semaglutide and Cardiovascular Outcomes in Patients with Type 2 Diabetes. *N Engl J Med* 2016;375:1834-1844.
9. Leiter LA, Bain SC, Hramiak I et al. Cardiovascular risk reduction with once-weekly semaglutide in subjects with type 2 diabetes: a post hoc analysis of gender, age, and baseline CV risk profile in the SUSTAIN 6 trial. *Cardiovasc Diabetol* 2019;18:73.
10. Holman RR, Bethel MA, Mentz RJ et al. Effects of Once-Weekly Exenatide on Cardiovascular Outcomes in Type 2 Diabetes. *N Engl J Med* 2017;377:1228-1239.
11. Mentz RJ, Thompson VP, Aguilar D et al. Effects of Once-Weekly Exenatide on Clinical Outcomes in Patients With Preexisting Cardiovascular Disease. *Circulation* 2018;138:2576-2578.
12. Neal B, Perkovic V, Mahaffey KW et al. Canagliflozin and Cardiovascular and Renal Events in Type 2 Diabetes. *N Engl J Med* 2017;377:644-657.
13. Mahaffey KW, Neal B, Perkovic V et al. Canagliflozin for Primary and Secondary Prevention of Cardiovascular Events: Results From the CANVAS Program (Canagliflozin Cardiovascular Assessment Study). *Circulation* 2018;137:323-334.
14. Perkovic V, Jardine MJ, Neal B et al. Canagliflozin and Renal Outcomes in Type 2 Diabetes and Nephropathy. *N Engl J Med* 2019;380:2295-2306.
15. Mahaffey KW, Jardine MJ, Bompont S et al. Canagliflozin and Cardiovascular and Renal Outcomes in Type 2 Diabetes Mellitus and Chronic Kidney Disease in Primary and Secondary Cardiovascular Prevention Groups. *Circulation* 2019;140:739-750.



## Additional data sources

### SAVOR (1-7)

1. Mosenzon O, Raz I, Scirica BM et al. Baseline characteristics of the patient population in the Saxagliptin Assessment of Vascular Outcomes Recorded in patients with diabetes mellitus (SAVOR)-TIMI 53 trial. *Diabetes Metab Res Rev* 2013;29:417-26.
2. Scirica BM, Bhatt DL, Braunwald E et al. The design and rationale of the saxagliptin assessment of vascular outcomes recorded in patients with diabetes mellitus-thrombolysis in myocardial infarction (SAVOR-TIMI) 53 study. *Am Heart J* 2011;162:818-825 e6.
3. Center for Drug Evaluation and Research: Briefing Material - NDA 22350: SAXAGLIPTIN (ONGLYZA); NDA 200678: SAXAGLIPTIN/METFORMIN (KOMBIGLYZE XR). 2015. Endocrinologic and Metabolic Drugs Advisory Committee (EMDAC), US Food and Drug Administration. Available from: <https://www.fdanews.com/ext/resources/files/04-15/04-10-15-Onglyzareview.pdf?1520668813>. Accessed Jun 2019.
4. Scirica BM, Braunwald E, Raz I et al. Heart failure, saxagliptin, and diabetes mellitus: observations from the SAVOR-TIMI 53 randomized trial. *Circulation* 2014;130:1579-88.
5. Mosenzon O, Leibowitz G, Bhatt DL et al. Effect of Saxagliptin on Renal Outcomes in the SAVOR-TIMI 53 Trial. *Diabetes Care* 2017;40:69-76.
6. Scirica BM, Mosenzon O, Bhatt DL et al. Cardiovascular Outcomes According to Urinary Albumin and Kidney Disease in Patients With Type 2 Diabetes at High Cardiovascular Risk: Observations From the SAVOR-TIMI 53 Trial. *JAMA Cardiol* 2018;3:155-163.
7. Gutierrez JA, Scirica BM, Bonaca MP et al. Prevalence and Outcomes of Polyvascular (Coronary, Peripheral, or Cerebrovascular) Disease in Patients With Diabetes Mellitus (From the SAVOR-TIMI 53 Trial). *Am J Cardiol* 2019;123:145-152.

### EXAMINE (1-7)

1. White WB, Bakris GL, Bergenstal RM et al. EXamination of cArdiovascular outcoMes with alogliptIN versus standard of carE in patients with type 2 diabetes mellitus and acute coronary syndrome (EXAMINE): a cardiovascular safety study of the dipeptidyl peptidase 4 inhibitor alogliptin in patients with type 2 diabetes with acute coronary syndrome. *Am Heart J* 2011;162:620-626 e1.
2. Takeda Pharmaceuticals: NESINA (Alogliptin); OSENI (Alogliptin and Pioglitazone); KAZANO (Alogliptin and Metformin) - Briefing Document. 2015. Endocrinologic and Metabolic Drugs Advisory Committee (EMDAC), US Food and Drug Administration. Available from: [https://www.pharmamedtechbi.com/~media/Supporting%20Documents/The%20Pink%20Sheet%20DAILY/2015/April/Alogliptin\\_AC\\_Takeda\\_brfg.pdf](https://www.pharmamedtechbi.com/~media/Supporting%20Documents/The%20Pink%20Sheet%20DAILY/2015/April/Alogliptin_AC_Takeda_brfg.pdf). Accessed May 2019.
3. Cavender MA, White WB, Liu Y et al. Total cardiovascular events analysis of the EXAMINE trial in patients with type 2 diabetes and recent acute coronary syndrome. *Clin Cardiol* 2018;41:1022-1027.
4. Zannad F, Cannon CP, Cushman WC et al. Heart failure and mortality outcomes in patients with type 2 diabetes taking alogliptin versus placebo in EXAMINE: a multicentre, randomised, double-blind trial. *Lancet* 2015;385:2067-76.
5. Garlo KG, White WB, Bakris GL et al. Kidney Biomarkers and Decline in eGFR in Patients with Type 2 Diabetes. *Clin J Am Soc Nephrol* 2018;13:398-405.
6. White W. ACE Inhibitor Use and Cardiovascular Outcomes in Patients with Type 2 Diabetes and Coronary Disease Treated with the DPP-4 Inhibitor Alogliptin. ADA 75th Scientific Sessions. Boston, USA: American Diabetes Association, 2015.

7. Shimada YJ, Cannon CP, Liu Y et al. Ischemic cardiac outcomes and hospitalizations according to prior macrovascular disease status in patients with type 2 diabetes and recent acute coronary syndrome from the Examination of Cardiovascular Outcomes with Alogliptin versus Standard of Care trial. *Am Heart J* 2016;175:18-27.

### **TECOS (1-6)**

1. Green JB, Bethel MA, Paul SK et al. Rationale, design, and organization of a randomized, controlled Trial Evaluating Cardiovascular Outcomes with Sitagliptin (TECOS) in patients with type 2 diabetes and established cardiovascular disease. *Am Heart J* 2013;166:983-989.e7.
2. Bethel MA, Green JB, Milton J et al. Regional, age and sex differences in baseline characteristics of patients enrolled in the Trial Evaluating Cardiovascular Outcomes with Sitagliptin (TECOS). *Diabetes Obes Metab* 2015;17:395-402.
3. Cornel JH, Bakris GL, Stevens SR et al. Effect of Sitagliptin on Kidney Function and Respective Cardiovascular Outcomes in Type 2 Diabetes: Outcomes From TECOS. *Diabetes Care* 2016;39:2304-2310.
4. McGuire DK, Van de Werf F, Armstrong PW et al. Association Between Sitagliptin Use and Heart Failure Hospitalization and Related Outcomes in Type 2 Diabetes Mellitus: Secondary Analysis of a Randomized Clinical Trial. *JAMA Cardiol* 2016;1:126-35.
5. Alfredsson J, Green JB, Stevens SR et al. Sex differences in management and outcomes of patients with type 2 diabetes and cardiovascular disease: A report from TECOS. *Diabetes Obes Metab* 2018;20:2379-2388.
6. Nauck MA, McGuire DK, Pieper KS et al. Sitagliptin does not reduce the risk of cardiovascular death or hospitalization for heart failure following myocardial infarction in patients with diabetes: observations from TECOS. *Cardiovasc Diabetol* 2019;18:116.

### **CARMELINA (1,2)**

1. Rosenstock J, Perkovic V, Alexander JH et al. Rationale, design, and baseline characteristics of the CARDiovascular safety and Renal Microvascular outcomE study with LINAgliptin (CARMELINA((R))): a randomized, double-blind, placebo-controlled clinical trial in patients with type 2 diabetes and high cardio-renal risk. *Cardiovasc Diabetol* 2018;17:39.
2. McGuire DK, Alexander JH, Johansen OE et al. Linagliptin Effects on Heart Failure and Related Outcomes in Individuals With Type 2 Diabetes Mellitus at High Cardiovascular and Renal Risk in CARMELINA. *Circulation* 2019;139:351-361.

### **ELIXA (1-3)**

1. Muskiet MHA, Tonneijck L, Huang Y et al. Lixisenatide and renal outcomes in patients with type 2 diabetes and acute coronary syndrome: an exploratory analysis of the ELIXA randomised, placebo-controlled trial. *Lancet Diabetes Endocrinol* 2018;6:859-869.
2. Bentley-Lewis R, Aguilar D, Riddle MC et al. Rationale, design, and baseline characteristics in Evaluation of LIXisenatide in Acute Coronary Syndrome, a long-term cardiovascular end point trial of lixisenatide versus placebo. *Am Heart J* 2015;169:631-638.e7.
3. Center for Drug Evaluation and Research: Application No.: 208471 Statistical Review. 2016. US Food and Drug Administration. Available from: [https://www.accessdata.fda.gov/drugsatfda\\_docs/nda/2016/208471Orig1s000TOC.cfm](https://www.accessdata.fda.gov/drugsatfda_docs/nda/2016/208471Orig1s000TOC.cfm). Accessed May 2019.

### **LEADER (1-7)**

1. Mann JFE, Orsted DD, Brown-Frandsen K et al. Liraglutide and Renal Outcomes in Type 2 Diabetes. *N Engl J Med* 2017;377:839-848.
2. Marso SP, Poulter NR, Nissen SE et al. Design of the liraglutide effect and action in diabetes: evaluation of cardiovascular outcome results (LEADER) trial. *Am Heart J* 2013;166:823-30.e5.
3. Verma S, Poulter NR, Bhatt DL et al. Effects of Liraglutide on Cardiovascular Outcomes in Patients With Type 2 Diabetes Mellitus With or Without History of Myocardial Infarction or Stroke. *Circulation* 2018;138:2884-2894.
4. Verma S, Bhatt DL, Bain SC et al. Effect of Liraglutide on Cardiovascular Events in Patients With Type 2 Diabetes Mellitus and Polyvascular Disease: Results of the LEADER Trial. *Circulation* 2018;137:2179-2183.
5. Marso SP, Nauck MA, Monk Fries T et al. Myocardial Infarction Subtypes in Patients With Type 2 Diabetes Mellitus and the Effect of Liraglutide Therapy (from the LEADER Trial). *Am J Cardiol* 2018;121:1467-1470.
6. Novo Nordisk: Victoza® (liraglutide) Injection Evaluation of Cardiovascular Outcome Results from LEADER®. 2017. Endocrinologic and Metabolic Drugs Advisory Committee (EMDAC), US Food and Drug Administration. Available from: <https://www.fda.gov/advisory-committees/endocrinologic-and-metabolic-drugs-advisory-committee/slides-june-20-2017-meeting-endocrinologic-and-metabolic-drugs-advisory-committee-emdac>. Accessed May 2019.
7. Nauck MA, Buse JB, Monk-Hansen T et al. Detailed description of myocardial infarctions and the various subtypes in the LEADER trial. *European Heart Journal*;38:ehx502.P2089 (published abstract).

### **SUSTAIN-6 (1-3)**

1. Goldenberg RM, Steen O. Semaglutide: Review and Place in Therapy for Adults With Type 2 Diabetes. *Can J Diabetes* 2019;43:136-145.
2. Leiter LA, Bain SC, Hramiak I et al. Cardiovascular risk reduction with once-weekly semaglutide in subjects with type 2 diabetes: a post hoc analysis of gender, age, and baseline CV risk profile in the SUSTAIN 6 trial. *Cardiovasc Diabetol* 2019;18:73.
3. Novo Nordisk: Semaglutide subcutaneous once-weekly: Treatment to Improve Glycemic Control in Adults with Type 2 Diabetes Mellitus. NDA 209637 Briefing Document. 2017. Endocrinologic and Metabolic Drugs Advisory Committee (EMDAC), US Food and Drug Administration. Available from: <https://www.fda.gov/media/108311/download>. Accessed May 2019.

### **EXSCEL (1-7)**

1. Holman RR, Bethel MA, George J et al. Rationale and design of the EXenatide Study of Cardiovascular Event Lowering (EXSCEL) trial. *Am Heart J* 2016;174:103-10.
2. Mentz RJ, Bethel MA, Gustavson S et al. Baseline characteristics of patients enrolled in the Exenatide Study of Cardiovascular Event Lowering (EXSCEL). *Am Heart J* 2017;187:1-9.
3. Clegg LE, Heerspink HJL, Penland RC et al. Reduction of Cardiovascular Risk and Improved Estimated Glomerular Filtration Rate by SGLT2 Inhibitors, Including Dapagliflozin, Is Consistent Across the Class: An Analysis of the Placebo Arm of EXSCEL. *Diabetes Care* 2019;42:318-326.
4. Mentz RJ, Bethel MA, Merrill P et al. Effect of Once-Weekly Exenatide on Clinical Outcomes According to Baseline Risk in Patients With Type 2 Diabetes Mellitus: Insights From the EXSCEL Trial. *J Am Heart Assoc* 2018;7:e009304.
5. Badjatiya A, Merrill P, Buse JB et al. Clinical Outcomes in Patients With Type 2 Diabetes Mellitus and Peripheral Artery Disease: Results From the EXSCEL Trial. *Circ Cardiovasc Interv* 2019;12:e008018.
6. Fudim M, White J, Pagidipati NJ et al. Effect of Once-Weekly Exenatide in Patients With Type 2 Diabetes Mellitus With and Without Heart Failure and Heart Failure-Related Outcomes: Insights From the EXSCEL Trial. *Circulation* 2019;140:1613-1622.
7. Mentz RJ, Thompson VP, Aguilar D et al. Effects of Once-Weekly Exenatide on Clinical Outcomes in Patients With Preexisting Cardiovascular Disease. *Circulation* 2018;138:2576-2578.

### **HARMONY (1,2)**

1. Green JB, Hernandez AF, D'Agostino RB et al. Harmony Outcomes: A randomized, double-blind, placebo-controlled trial of the effect of albiglutide on major cardiovascular events in patients with type 2 diabetes mellitus-Rationale, design, and baseline characteristics. *Am Heart J* 2018;203:30-38.
2. McMurray J. GLP-1 receptor agonists and DPP-4 inhibitors: The Cardiology perspective. *Heart Failure* 2019. Athens, Greece: European Society of Cardiology, 2019.

### **EMPA-REG (1-5)**

1. Zinman B, Inzucchi SE, Lachin JM et al. Rationale, design, and baseline characteristics of a randomized, placebo-controlled cardiovascular outcome trial of empagliflozin (EMPA-REG OUTCOME). *Cardiovasc Diabetol* 2014;13:102.
2. Fitchett D, Zinman B, Wanner C et al. Heart failure outcomes with empagliflozin in patients with type 2 diabetes at high cardiovascular risk: results of the EMPA-REG OUTCOME(R) trial. *Eur Heart J* 2016;37:1526-34.
3. Fitchett D, Inzucchi SE, Cannon CP et al. Empagliflozin Reduced Mortality and Hospitalization for Heart Failure Across the Spectrum of Cardiovascular Risk in the EMPA-REG OUTCOME Trial. *Circulation* 2019;139:1384-1395.
4. Fitchett D, Butler J, van de Borne P et al. Effects of empagliflozin on risk for cardiovascular death and heart failure hospitalization across the spectrum of heart failure risk in the EMPA-REG OUTCOME(R) trial. *Eur Heart J* 2018;39:363-370.
5. Zinman B, Inzucchi SE, Lachin JM et al. Empagliflozin and Cerebrovascular Events in Patients With Type 2 Diabetes Mellitus at High Cardiovascular Risk. *Stroke* 2017;48:1218-1225.

### **CANVAS (1-5)**

1. Neal B, Perkovic V, Matthews DR et al. Rationale, design and baseline characteristics of the CANagliflozin cardioVascular Assessment Study-Renal (CANVAS-R): A randomized, placebo-controlled trial. *Diabetes Obes Metab* 2017;19:387-393.
2. Mahaffey KW, Neal B, Perkovic V et al. Canagliflozin for Primary and Secondary Prevention of Cardiovascular Events: Results From the CANVAS Program (Canagliflozin Cardiovascular Assessment Study). *Circulation* 2018;137:323-334.
3. Radholm K, Figtree G, Perkovic V et al. Canagliflozin and Heart Failure in Type 2 Diabetes Mellitus. *Circulation* 2018;138:458-468.
4. Zhou Z, Lindley RI, Radholm K et al. Canagliflozin and Stroke in Type 2 Diabetes Mellitus. *Stroke* 2019;50:396-404.
5. Perkovic V, de Zeeuw D, Mahaffey KW et al. Canagliflozin and renal outcomes in type 2 diabetes: results from the CANVAS Program randomised clinical trials. *Lancet Diabetes Endocrinol* 2018;6:691-704.

### **DECLARE (1-6)**

1. Raz I, Mosenzon O, Bonaca MP et al. DECLARE-TIMI 58: Participants' baseline characteristics. *Diabetes Obes Metab* 2018;20:1102-1110.
2. Wiviott SD, Raz I, Bonaca MP et al. The design and rationale for the Dapagliflozin Effect on Cardiovascular Events (DECLARE)-TIMI 58 Trial. *Am Heart J* 2018;200:83-89.
3. Mosenzon O, Wiviott SD, Cahn A et al. Effects of dapagliflozin on development and progression of kidney disease in patients with type 2 diabetes: an analysis from the DECLARE-TIMI 58 randomised trial. *Lancet Diabetes Endocrinol* 2019;7:606-617.
4. Committee for Medicinal Products for Human Use: Assessment report: EMA/476671/2019. 2019. European Medicines Agency. Available from: [https://www.ema.europa.eu/en/documents/variation-report/forxiga-h-c-2322-ws-1539-epar-assessment-report-variation\\_en.pdf](https://www.ema.europa.eu/en/documents/variation-report/forxiga-h-c-2322-ws-1539-epar-assessment-report-variation_en.pdf). November, 2019.
5. Furtado RHM, Bonaca MP, Raz I et al. Dapagliflozin and Cardiovascular Outcomes in Patients With Type 2 Diabetes Mellitus and Previous Myocardial Infarction. *Circulation* 2019;139:2516-2527.

6. Zelniker TA, Wiviott SD, Raz I et al. Comparison of the Effects of Glucagon-Like Peptide Receptor Agonists and Sodium-Glucose Cotransporter 2 Inhibitors for Prevention of Major Adverse Cardiovascular and Renal Outcomes in Type 2 Diabetes Mellitus. *Circulation* 2019;139:2022-2031.

#### **CREDENCE (1,2)**

1. Jardine MJ, Mahaffey KW, Neal B et al. The Canagliflozin and Renal Endpoints in Diabetes with Established Nephropathy Clinical Evaluation (CREDENCE) Study Rationale, Design, and Baseline Characteristics. *Am J Nephrol* 2017;46:462-472.
2. Mahaffey KW, Jardine MJ, Bompont S et al. Canagliflozin and Cardiovascular and Renal Outcomes in Type 2 Diabetes Mellitus and Chronic Kidney Disease in Primary and Secondary Cardiovascular Prevention Groups. *Circulation* 2019;140:739-750.
